# Supplementary material for: Overactive mTOR signaling leads to endometrial hyperplasia in aged women and mice
Source: PubMed Central journal article supplement (PMC5352319; doi:10.18632/oncotarget.13919), 2016-12-12
Supplement: oncotarget-08-7265-s001.pdf [file oncotarget-08-7265-s001.pdf]

# Overactive mTOR signaling leads to endometrial hyperplasia in aged women and mice

## Supplementary Material

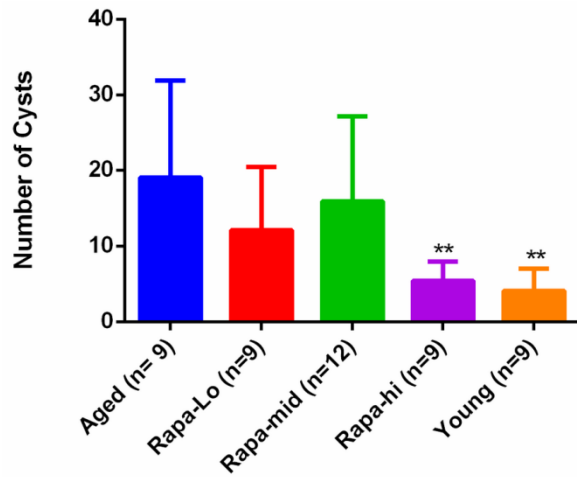

**SFig. 1.** Quantification of a number of epithelial cysts in uteri of different rapamycin treated groups and control.

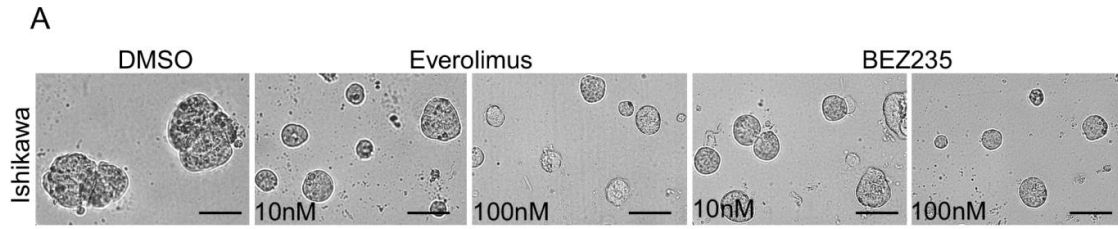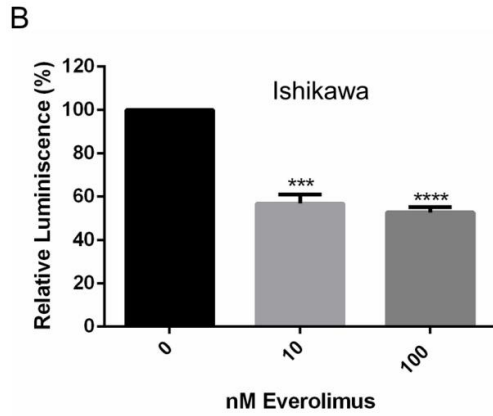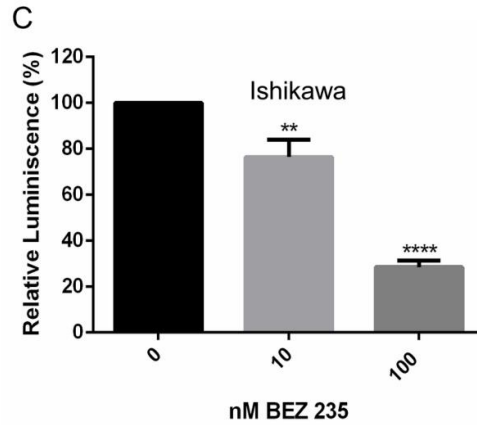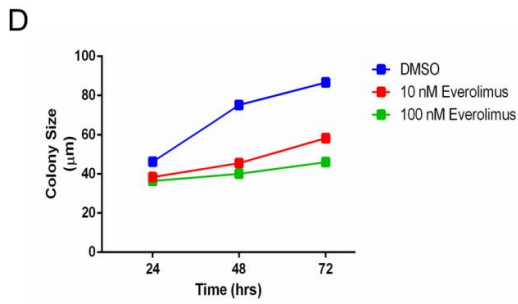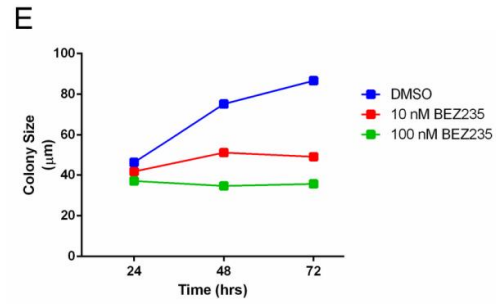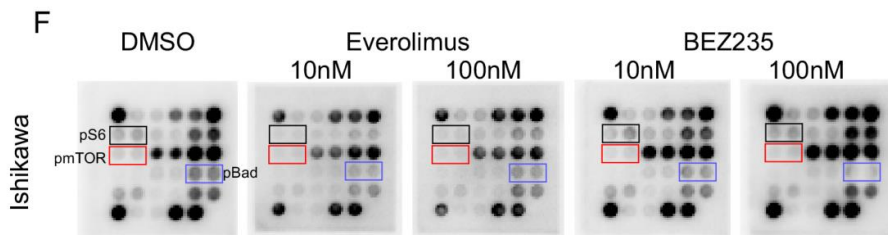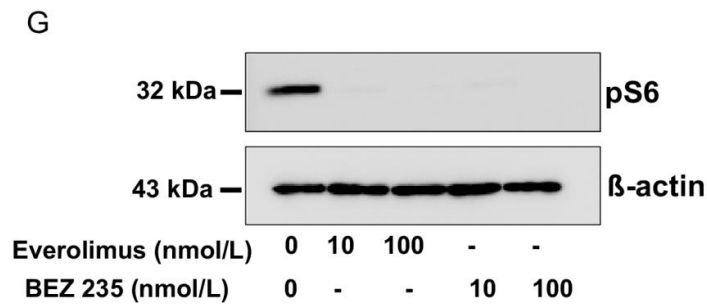

**SFig. 2. mTOR inhibitors suppress the growth of 3D spheroids of Pten-negative endometrial cancer cells.** Representative pictures of Ishikawa cells cultured in 3D with increasing doses of mTOR inhibitors, Everolimus and BEZ235 (A). 72 hours after culture, cell viability was assessed using CellTiter-Glo<sup>®</sup> Luminescent cell viability assay (B and C). Colony size for 3D spheroids was measured after 24h, 48h and 72h of treatment with mTOR inhibitors (D and E). The data shown are mean  $\pm$ SEM of three individual experiments. \*\* $P < 0.01$ , \*\*\* $P < 0.001$ , \*\*\*\* $P < 0.0001$ , Student's *t*-test. Ishikawa cells in 3D culture were treated with DMSO control or increasing concentrations of Everolimus or BEZ235. 72 hours later, whole cell lysates were subjected to AKT/mTOR signaling antibody protein array (F). Whole cell lysates from Ishikawa spheroids treated with increasing doses of Everolimus and BEZ235 were subjected to western blot analysis for pS6 (G). The data shown are representative of three individual western blot analyses.  $\beta$ -actin was used as a loading control.
